# Supplementary material
Source: PubMed Central journal article supplement (PMC5110000)
Supplement: supp_jlb.2A1215-555RR_Supplemental_Figure1.pdf [file supp_jlb.2A1215-555RR_Supplemental_Figure1.pdf]

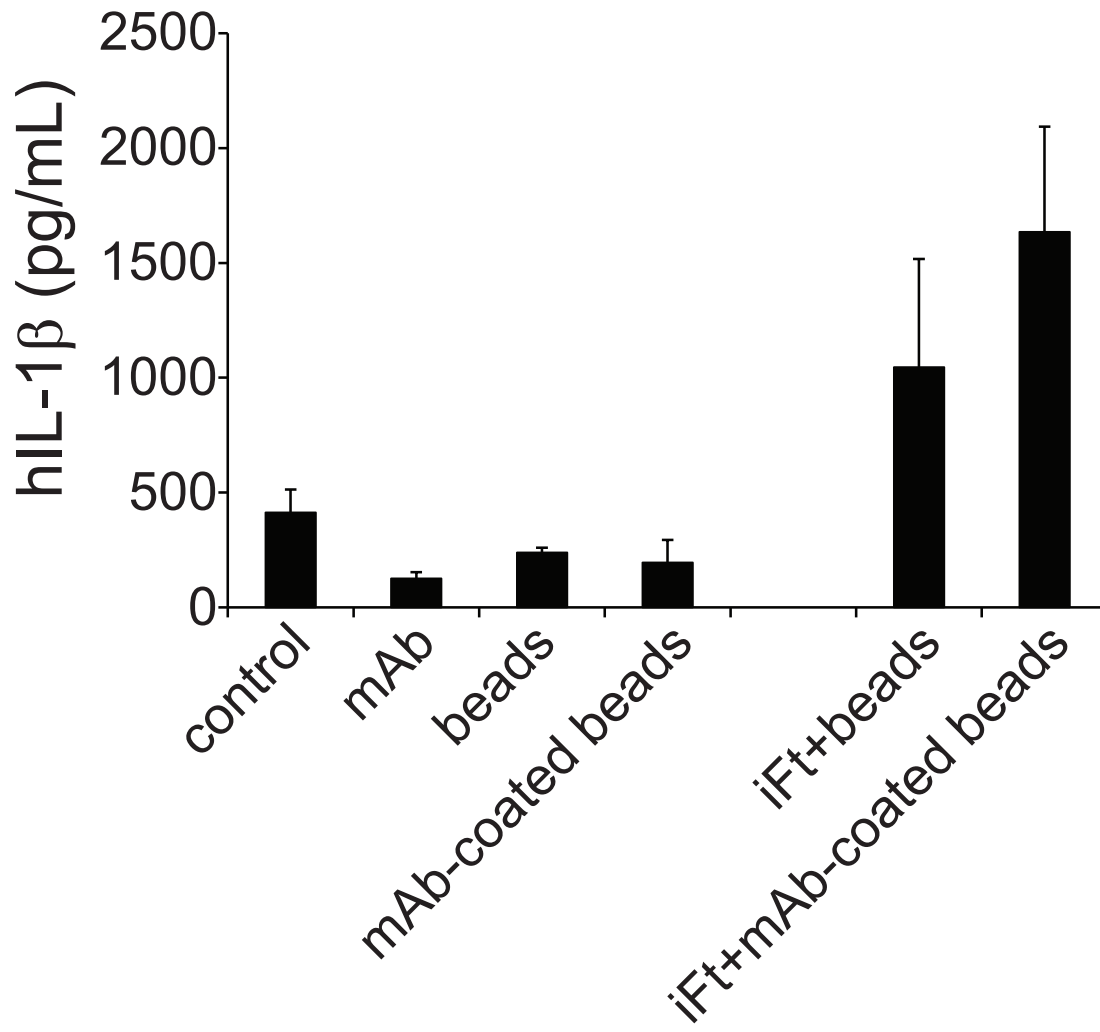

**Supplemental Figure 1.** PMA-treated THP-1 were unstimulated or stimulated with mAb, 1  $\mu$ m polystyrene beads alone (beads), beads coated with mAb (mAb-coated beads), iFt with uncoated beads (iFt + beads), or iFt with mAb-coated beads (iFt+mAb-coated beads) and cell-free culture supernatants were analyzed for IL-1 $\beta$  by ELISA following 24 h of stimulation. Results are averages of three independent experiments with error bars indicating SEM.
