# Supplementary material
Source: PubMed Central journal article supplement (PMC5110000)
Supplement: supp_jlb.2A1215-555RR_Supplemental_Figure2.pdf [file supp_jlb.2A1215-555RR_Supplemental_Figure2.pdf]

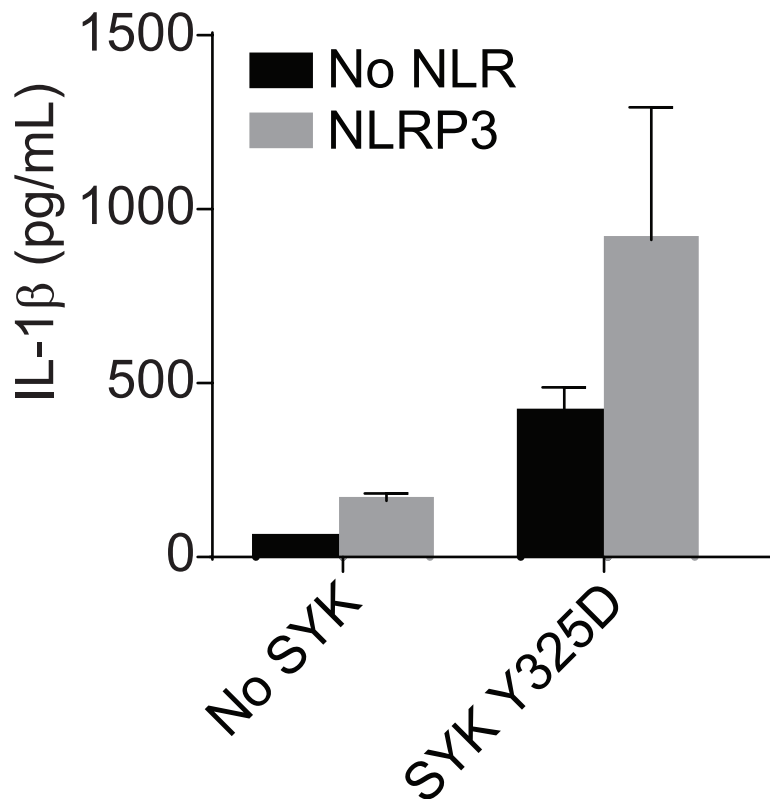

**Supplemental Figure 2.** HEK293T cells were transfected with plasmids encoding pro-caspase1 (50 ng), pro-IL1 $\beta$  (200 ng), ASC (10 ng), with or without an NLRP3 (100 ng) and with or without constitutively-active Y325D mutant SYK (100 ng). After 24 h, culture supernatants were collected by centrifugation, and secreted IL-1 $\beta$  was measured by ELISA. Results are representative of three independent experiments with error bars indicating standard deviation.
